# Supplementary material for: Correlation between TIM-1 gene polymorphisms and the risk of developing lung cancer
Source: Research Square preprint supplement (doi:10.21203/rs.3.rs-5863740/v1), 2025-02-06
Supplement: Supplementary file 1 [file 624b52649061e5cfe98691f6.xlsx]

## Sheet: Sheet1
Groups	Groups	Male/Female	BMI（kg/m2）	Pathological	TNM stage
Lung cancer	Lung cancer	Male	21.6609	adenocarcinoma	Ⅳ
Lung cancer	Lung cancer	Male	21.2953	squamous carcinoma	Ⅳ
Lung cancer	Lung cancer	Female	23.1834	adenocarcinoma	Ⅳ
Lung cancer	Lung cancer	Male	20.984	squamous carcinoma	III
Lung cancer	Lung cancer	Male	16.3265	squamous carcinoma	III
Lung cancer	Lung cancer	Male	16.5289	squamous carcinoma	Ⅳ
Lung cancer	Lung cancer	Male	23.1834	adenocarcinoma	Ⅳ
Lung cancer	Lung cancer	Male	21.4844	SCLC	Ⅳ
Lung cancer	Lung cancer	Male	18.937	squamous carcinoma	III
Lung cancer	Lung cancer	Male	20.148	squamous carcinoma	III
Lung cancer	Lung cancer	Female	19.5894	adenocarcinoma	Ⅳ
Lung cancer	Lung cancer	Male	19.0448	adenocarcinoma	Ⅳ
Lung cancer	Lung cancer	Male	21.875	squamous carcinoma	Ⅳ
Lung cancer	Lung cancer	Male	26.2346	adenocarcinoma	II
Lung cancer	Lung cancer	Male	23.5078	adenocarcinoma	Ⅳ
Lung cancer	Lung cancer	Male	19.1406	squamous carcinoma	III
Lung cancer	Lung cancer	Male	27.1416	squamous carcinoma	II
Lung cancer	Lung cancer	Male	16.609	SCLC	Ⅳ
Lung cancer	Lung cancer	Male	20.9366	adenocarcinoma	Ⅳ
Lung cancer	Lung cancer	Male	20.7031	squamous carcinoma	III
Lung cancer	Lung cancer	Male	17.6309	SCLC	III
Lung cancer	Lung cancer	Male	23.1834	squamous carcinoma	II
Lung cancer	Lung cancer	Male	22.8374	squamous carcinoma	II
Lung cancer	Lung cancer	Male	23.1834	adenocarcinoma	Ⅳ
Lung cancer	Lung cancer	Male	24.8833	adenocarcinoma	Ⅳ
Lung cancer	Lung cancer	Male	19.3772	squamous carcinoma	I
Lung cancer	Lung cancer	Male	17.7778	squamous carcinoma	III
Lung cancer	Lung cancer	Female	23.8343	adenocarcinoma	III
Lung cancer	Lung cancer	Male	18.848	squamous carcinoma	Ⅳ
Lung cancer	Lung cancer	Female	22.5069	adenocarcinoma	Ⅳ
Lung cancer	Lung cancer	Male	23.3242	squamous carcinoma	Ⅳ
Lung cancer	Lung cancer	Male	19.7266	squamous carcinoma	III
Lung cancer	Lung cancer	Female	16.2177	adenocarcinoma	Ⅳ
Lung cancer	Lung cancer	Female	22.8928	squamous carcinoma	Ⅳ
Lung cancer	Lung cancer	Female	20	adenocarcinoma	Ⅳ
Lung cancer	Lung cancer	Male	22.9481	adenocarcinoma	Ⅳ
Lung cancer	Lung cancer	Male	19.1953	sarcomatoid carcinoma	III
Lung cancer	Lung cancer	Male	15.7943	SCLC	Ⅳ
Lung cancer	Lung cancer	Male	22.2957	adenocarcinoma	III
Lung cancer	Lung cancer	Male	22.4913	SCLC	III
Lung cancer	Lung cancer	Male	19.9792	adenocarcinoma	III
Lung cancer	Lung cancer	Male	24.7409	squamous carcinoma	Ⅳ
Lung cancer	Lung cancer	Male	24.6755	squamous carcinoma	Ⅳ
Lung cancer	Lung cancer	Male	21.3672	adenocarcinoma	Ⅳ
Lung cancer	Lung cancer	Male	20.2374	SCLC	Ⅳ
Lung cancer	Lung cancer	Male	24.2215	SCLC	Ⅳ
Lung cancer	Lung cancer	Male	18.8	squamous carcinoma	Ⅳ
Lung cancer	Lung cancer	Male	17.9688	squamous carcinoma	I
Lung cancer	Lung cancer	Female	23.3091	adenocarcinoma	Ⅳ
Lung cancer	Lung cancer	Male	18.7783	SCLC	Ⅳ
Lung cancer	Lung cancer	Male	23.2335	adenocarcinoma	III
Lung cancer	Lung cancer	Male	19.481	SCLC	III
Lung cancer	Lung cancer	Male	21.2585	adenocarcinoma	Ⅳ
Lung cancer	Lung cancer	Female	20.6612	adenocarcinoma	II
Lung cancer	Lung cancer	Female	25.4767	adenocarcinoma	Ⅳ
Lung cancer	Lung cancer	Male	19.0311	adenocarcinoma	III
Lung cancer	Lung cancer	Female	19.428	adenocarcinoma	III
Lung cancer	Lung cancer	Female	23.1533	adenocarcinoma	Ⅳ
Lung cancer	Lung cancer	Male	15.5238	squamous carcinoma	III
Lung cancer	Lung cancer	Male	25.8478	squamous carcinoma	Ⅳ
Lung cancer	Lung cancer	Male	22.4321	squamous carcinoma	III
Lung cancer	Lung cancer	Male	23.3355	SCLC	Ⅳ
Lung cancer	Lung cancer	Female	23.7118	SCLC	III
Lung cancer	Lung cancer	Male	18.1164	SCLC	Ⅳ
Lung cancer	Lung cancer	Female	18.8707	adenocarcinoma	II
Lung cancer	Lung cancer	Female	26.6065	adenocarcinoma	Ⅳ
Lung cancer	Lung cancer	Male	20.4618	squamous carcinoma	III
Lung cancer	Lung cancer	Male	23.391	adenocarcinoma	Ⅳ
Lung cancer	Lung cancer	Male	18.5658	squamous carcinoma	II
Lung cancer	Lung cancer	Male	22.2656	squamous carcinoma	Ⅳ
Lung cancer	Lung cancer	Male	25.2342	SCLC	III
Lung cancer	Lung cancer	Male	25.9516	adenocarcinoma	III
Lung cancer	Lung cancer	Female	40.2074	squamous carcinoma	Ⅳ
Lung cancer	Lung cancer	Male	20.4152	squamous carcinoma	III
Lung cancer	Lung cancer	Male	18.4425	adenocarcinoma	III
Lung cancer	Lung cancer	Female	22.2656	adenocarcinoma	Ⅳ
Lung cancer	Lung cancer	Male	23.8751	SCLC	Ⅳ
Lung cancer	Lung cancer	Male	23.9158	adenocarcinoma	I
Lung cancer	Lung cancer	Male	18.6122	adenocarcinoma	Ⅳ
Lung cancer	Lung cancer	Female	22.317	adenocarcinoma	III
Lung cancer	Lung cancer	Male	17.5064	squamous carcinoma	II
Lung cancer	Lung cancer	Female	22.2222	SCLC	II
Lung cancer	Lung cancer	Male	19.669	squamous carcinoma	Ⅳ
Lung cancer	Lung cancer	Male	21.1073	SCLC	I
Lung cancer	Lung cancer	Male	22.8512	squamous carcinoma	Ⅳ
Lung cancer	Lung cancer	Male	20.0781	adenocarcinoma	Ⅳ
Lung cancer	Lung cancer	Male	20.7612	adenocarcinoma	Ⅳ
Lung cancer	Lung cancer	Male	19.1327	squamous carcinoma	Ⅱ
Lung cancer	Lung cancer	Male	17.9614	squamous carcinoma	Ⅳ
Lung cancer	Lung cancer	Male	19.428	adenocarcinoma	III
Lung cancer	Lung cancer	Male	26.1646	squamous carcinoma	III
Lung cancer	Lung cancer	Female	22.5598	adenocarcinoma	II
Lung cancer	Lung cancer	Female	22.6562	adenocarcinoma	Ⅳ
Lung cancer	Lung cancer	Male	21.2585	adenocarcinoma	Ⅳ
Lung cancer	Lung cancer	Male	21.4533	adenocarcinoma	I
Lung cancer	Lung cancer	Male	21.7993	sarcomatoid carcinoma	Ⅳ
Lung cancer	Lung cancer	Male	20.3125	squamous carcinoma	Ⅳ
Lung cancer	Lung cancer	Female	18.6667	adenocarcinoma	Ⅳ
Lung cancer	Lung cancer	Female	21.0517	adenocarcinoma	III
Lung cancer	Lung cancer	Male	18.4375	squamous carcinoma	III
Lung cancer	Lung cancer	Male	16.0333	adenocarcinoma	Ⅳ
Lung cancer	Lung cancer	Male	21.4533	SCLC	Ⅳ
Lung cancer	Lung cancer	Female	20.3125	adenocarcinoma	Ⅳ
Lung cancer	Lung cancer	Male	17.9982	squamous carcinoma	Ⅳ
Lung cancer	Lung cancer	Male	27.0357	squamous carcinoma	III
Lung cancer	Lung cancer	Male	18.3655	adenocarcinoma	Ⅳ
Lung cancer	Lung cancer	Male	21.5978	squamous carcinoma	III
Lung cancer	Lung cancer	Male	21.5911	squamous carcinoma	Ⅳ
Lung cancer	Lung cancer	Male	23.8054	adenocarcinoma	Ⅳ
Lung cancer	Lung cancer	Male	21.2585	adenocarcinoma	Ⅳ
Lung cancer	Lung cancer	Male	24.4646	adenocarcinoma	Ⅳ
Lung cancer	Lung cancer	Male	17.7154	squamous carcinoma	Ⅳ
Lung cancer	Lung cancer	Male	19.0311	squamous carcinoma	III
Lung cancer	Lung cancer	Male	29.321	squamous carcinoma	III
Lung cancer	Lung cancer	Male	21.7993	SCLC	Ⅳ
Lung cancer	Lung cancer	Male	21.3333	squamous carcinoma	Ⅳ
Lung cancer	Lung cancer	Male	18.5568	squamous carcinoma	III
Lung cancer	Lung cancer	Male	24.1406	squamous carcinoma	I
Lung cancer	Lung cancer	Male	19.1467	SCLC	Ⅳ
Lung cancer	Lung cancer	Male	21.1203	squamous carcinoma	Ⅳ
Lung cancer	Lung cancer	Male	21.3333	squamous carcinoma	III
Lung cancer	Lung cancer	Male	16.955	squamous carcinoma	III
Lung cancer	Lung cancer	Male	21.7993	squamous carcinoma	Ⅳ
Lung cancer	Lung cancer	Male	23.1206	squamous carcinoma	II
Lung cancer	Lung cancer	Male	20.5693	squamous carcinoma	Ⅳ
Lung cancer	Lung cancer	Female	18.0889	adenocarcinoma	Ⅳ
Lung cancer	Lung cancer	Male	21.8549	squamous carcinoma	Ⅳ
Lung cancer	Lung cancer	Female	19.2336	adenocarcinoma	Ⅳ
Lung cancer	Lung cancer	Male	24.539	adenocarcinoma	Ⅳ
Lung cancer	Lung cancer	Male	19.1571	squamous carcinoma	II
Lung cancer	Lung cancer	Male	20.727	squamous carcinoma	III
Lung cancer	Lung cancer	Male	14.0408	squamous carcinoma	III
Lung cancer	Lung cancer	Female	23.1535	adenocarcinoma	III
Lung cancer	Lung cancer	Male	20.9366	SCLC	Ⅳ
Lung cancer	Lung cancer	Male	23.3067	adenocarcinoma	Ⅳ
Lung cancer	Lung cancer	Female	21.2444	squamous carcinoma	Ⅳ
Lung cancer	Lung cancer	Male	24.8016	adenocarcinoma	Ⅳ
Lung cancer	Lung cancer	Male	22.0703	adenocarcinoma	Ⅳ
Lung cancer	Lung cancer	Male	22.0415	adenocarcinoma	Ⅳ
Lung cancer	Lung cancer	Female	24.7768	adenocarcinoma	Ⅳ
Lung cancer	Lung cancer	Male	18.2531	squamous carcinoma	Ⅳ
Lung cancer	Lung cancer	Female	21.875	adenocarcinoma	Ⅳ
Lung cancer	Lung cancer	Male	17.3828	adenocarcinoma	Ⅳ
Lung cancer	Lung cancer	Female	17.5556	adenocarcinoma	Ⅳ
Lung cancer	Lung cancer	Male	16.2071	squamous carcinoma	Ⅳ
Lung cancer	Lung cancer	Male	19.1001	squamous carcinoma	Ⅳ
Lung cancer	Lung cancer	Female	19.8991	adenocarcinoma	Ⅳ
Lung cancer	Lung cancer	Male	18.6122	SCLC	III
Lung cancer	Lung cancer	Male	20.3806	adenocarcinoma	Ⅳ
Lung cancer	Lung cancer	Female	22.4204	adenocarcinoma	Ⅳ
Lung cancer	Lung cancer	Female	21.7914	squamous carcinoma	III
Lung cancer	Lung cancer	Female	22.5827	adenocarcinoma	III
Lung cancer	Lung cancer	Female	16.263	adenocarcinoma	Ⅳ
Lung cancer	Lung cancer	Female	22.151	adenocarcinoma	III
Lung cancer	Lung cancer	Female	18.3268	adenocarcinoma	Ⅳ
Lung cancer	Lung cancer	Male	21.7181	SCLC	Ⅳ
Lung cancer	Lung cancer	Male	20.898	adenocarcinoma	Ⅲ
Lung cancer	Lung cancer	Male	19.5502	sarcomatoid carcinoma	Ⅳ
Lung cancer	Lung cancer	Male	17.8748	adenocarcinoma	Ⅳ
Lung cancer	Lung cancer	Female	27.4435	adenocarcinoma	Ⅳ
Lung cancer	Lung cancer	Male	28.441	squamous carcinoma	Ⅱ
Lung cancer	Lung cancer	Female	16.1942	adenocarcinoma	III
Lung cancer	Lung cancer	Male	15.7943	SCLC	Ⅳ
Lung cancer	Lung cancer	Female	14.9609	adenocarcinoma	Ⅳ
Lung cancer	Lung cancer	Female	19.2716	sarcomatoid carcinoma	Ⅳ
Lung cancer	Lung cancer	Female	25.6	adenocarcinoma	Ⅳ
Lung cancer	Lung cancer	Female	20.202	adenocarcinoma	I
Lung cancer	Lung cancer	Male	22.4059	squamous carcinoma	I
Lung cancer	Lung cancer	Male	17.474	SCLC	Ⅳ
Lung cancer	Lung cancer	Female	24.4329	adenocarcinoma	Ⅳ
Lung cancer	Lung cancer	Female	22.9778	adenocarcinoma	Ⅳ
Lung cancer	Lung cancer	Male	24.0888	squamous carcinoma	III
Lung cancer	Lung cancer	Male	15.7943	squamous carcinoma	Ⅱ
Lung cancer	Lung cancer	Male	18.75	squamous carcinoma	III
Lung cancer	Lung cancer	Female	26.0204	squamous carcinoma	Ⅳ
Lung cancer	Lung cancer	Female	19.765	adenocarcinoma	Ⅲ
Lung cancer	Lung cancer	Male	22.9758	sarcomatoid carcinoma	III
Lung cancer	Lung cancer	Male	29.4118	adenocarcinoma	Ⅳ
Lung cancer	Lung cancer	Male	15.8367	squamous carcinoma	Ⅳ
Lung cancer	Lung cancer	Male	20.9042	SCLC	III
Lung cancer	Lung cancer	Male	23.0518	SCLC	Ⅳ
Lung cancer	Lung cancer	Male	21.4844	squamous carcinoma	III
Lung cancer	Lung cancer	Male	20.679	squamous carcinoma	III
Lung cancer	Lung cancer	Male	23.5755	adenocarcinoma	Ⅳ
Lung cancer	Lung cancer	Female	20.5049	adenocarcinoma	III
Lung cancer	Lung cancer	Male	20.202	adenocarcinoma	Ⅳ
Lung cancer	Lung cancer	Male	22.6757	SCLC	Ⅳ
Lung cancer	Lung cancer	Male	21.4533	squamous carcinoma	III
Lung cancer	Lung cancer	Male	19.8347	SCLC	III
Lung cancer	Lung cancer	Male	16.2634	SCLC	Ⅳ
Lung cancer	Lung cancer	Female	22.1104	adenocarcinoma	Ⅳ
	Control group	Female	24.85
	Control group	Male	27.69
	Control group	Male	23.39
	Control group	Male	27.47
	Control group	Female	21.89
	Control group	Female	31.46
	Control group	Male	22.33
	Control group	Female	27.78
	Control group	Female	21.05
	Control group	Female	23.65
	Control group	Male	22.88
	Control group	Male	25.46
	Control group	Male	24.24
	Control group	Male	20.4
	Control group	Female	27.15
	Control group	Female	21.34
	Control group	Male	24.62
	Control group	Male	25.23
	Control group	Male	24.43
	Control group	Male	24.21
	Control group	Female	17.5
	Control group	Female	22.05
	Control group	Female	19.19
	Control group	Female	24.53
	Control group	Female	23.98
	Control group	Female	22.81
	Control group	Female	22.83
	Control group	Male	26.84
	Control group	Male	24.01
	Control group	Female	21.02
	Control group	Male	26.96
	Control group	Male	25.03
	Control group	Male	24.12
	Control group	Female	22.74
	Control group	Female	25.32
	Control group	Female	20.79
	Control group	Male	26.03
	Control group	Male	22.95
	Control group	Female	25.64
	Control group	Male	27.44
	Control group	Male	29.81
	Control group	Female	28.54
	Control group	Female	28.85
	Control group	Male	28.33
	Control group	Male	27.02
	Control group	Female	27.55
	Control group	Male	27.24
	Control group	Male	28.26
	Control group	Male	30.25
	Control group	Male	29.42
	Control group	Male	25.63
	Control group	Male	24.56
	Control group	Male	26.31
	Control group	Male	23.19
	Control group	Male	25.4
	Control group	Male	17.8
	Control group	Female	19.8
	Control group	Male	18
	Control group	Male	23.8
	Control group	Male	28.46
	Control group	Female	26.98
	Control group	Female	20.24
	Control group	Female	18.73
	Control group	Female	19.99
	Control group	Female	25.19
	Control group	Female	20.4
	Control group	Female	20.14
	Control group	Female	24.53
	Control group	Female	24.19
	Control group	Male	26.15
	Control group	Male	27.66
	Control group	Male	20.69
	Control group	Female	23.73
	Control group	Male	25.93
	Control group	Male	23.88
	Control group	Male	23.8
	Control group	Male	26.59
	Control group	Male	20.16
	Control group	Male	21.6
	Control group	Female	23.22
	Control group	Male	22.95
	Control group	Male	23.9
	Control group	Female	25.73
	Control group	Female	22.13
	Control group	Male	19.18
	Control group	Male	28.99
	Control group	Female	19.69
	Control group	Male	27.89
	Control group	Male	21.25
	Control group	Male	26.29
	Control group	Male	23.32
	Control group	Male	29.05
	Control group	Female	28.36
	Control group	Male	26.51
	Control group	Male	26.03
	Control group	Male	25.05
	Control group	Male	22.02
	Control group	Male	31.19
	Control group	Male	25.09
	Control group	Male	28.83
	Control group	Male	18.26
	Control group	Male	24.58
	Control group	Male	23.31
	Control group	Male	28.19
	Control group	Male	27
	Control group	Female	23.78
	Control group	Male	27.93
	Control group	Male	24.85
	Control group	Male	26.35
