# Supplementary material for: Correlation between TIM-1 gene polymorphisms and the risk of developing lung cancer
Source: Research Square preprint supplement (doi:10.21203/rs.3.rs-5863740/v1), 2025-02-06
Supplement: Supplementary file 2 [file a83b2fb0d3230a14213e9e49.xlsx]

## Sheet: Sheet1
Sample type	Remark	TIM-1
		S716:rs1501909	S717:rs2036402	S718:rs2270924	S720:rs870581
		[G/T]	[A/G]	[A/T]	[A/G]
DNA	Lung cancer	TT	AA	TT	AA
DNA	Lung cancer	TT	AA	TT	AA
DNA	Lung cancer	TT	AA	TT	AA
DNA	Lung cancer	TT	AA	TT	AA
DNA	Lung cancer	GT	AA	TT	AG
DNA	Lung cancer	TT	AA	TT	AA
DNA	Lung cancer	GT	AG	TT	AG
DNA	Lung cancer	TT	AA	TT	AA
DNA	Lung cancer	GT	AA	AT	AG
DNA	Lung cancer	GG	AA	AT	GG
DNA	Lung cancer	TT	AA	TT	AA
DNA	Lung cancer	GT	AG	TT	AG
DNA	Lung cancer	GT	AA	AT	AG
DNA	Lung cancer	GT	AG	TT	AG
DNA	Lung cancer	GT	AA	AT	AG
DNA	Lung cancer	GG	AG	TT	GG
DNA	Lung cancer	TT	AA	TT	AA
DNA	Lung cancer	GT	AA	AT	AG
DNA	Lung cancer	TT	AA	TT	AG
DNA	Lung cancer	TT	AA	TT	AA
DNA	Lung cancer	GT	AA	TT	AG
DNA	Lung cancer	TT	AG	TT	AA
DNA	Lung cancer	TT	AA	TT	AA
DNA	Lung cancer	GT	AA	AT	AG
DNA	Lung cancer	GT	AG	TT	AG
DNA	Lung cancer	TT	AA	TT	AA
DNA	Lung cancer	GT	AG	TT	AG
DNA	Lung cancer	TT	AA	TT	AG
DNA	Lung cancer	GT	AA	AT	AG
DNA	Lung cancer	TT	AA	TT	AA
DNA	Lung cancer	TT	AA	TT	AA
DNA	Lung cancer	TT	AA	TT	AA
DNA	Lung cancer	GT	AG	TT	AG
DNA	Lung cancer	GT	AA	AT	AG
DNA	Lung cancer	GT	AA	AT	AG
DNA	Lung cancer	GT	AG	TT	AG
DNA	Lung cancer	TT	AA	TT	AA
DNA	Lung cancer	GT	AG	TT	AG
DNA	Lung cancer	GT	AG	TT	AG
DNA	Lung cancer	TT	AA	TT	AA
DNA	Lung cancer	TT	AA	TT	AA
DNA	Lung cancer	TT	AA	TT	AA
DNA	Lung cancer	GT	AA	AT	AG
DNA	Lung cancer	GT	AA	TT	AA
DNA	Lung cancer	TT	AA	TT	AA
DNA	Lung cancer	TT	AA	TT	AA
DNA	Lung cancer	TT	AA	TT	AA
DNA	Lung cancer	TT	AA	TT	AA
DNA	Lung cancer	TT	AA	TT	AA
DNA	Lung cancer	GT	AA	AT	AG
DNA	Lung cancer	TT	AA	TT	AA
DNA	Lung cancer	GG	AA	AT	GG
DNA	Lung cancer	TT	AA	TT	AA
DNA	Lung cancer	GT	AA	AT	AG
DNA	Lung cancer	GT	AG	TT	AG
DNA	Lung cancer	GT	AG	TT	AG
DNA	Lung cancer	TT	AA	TT	AA
DNA	Lung cancer	TT	AA	TT	AA
DNA	Lung cancer	GT	AG	TT	AG
DNA	Lung cancer	GG	GG	TT	GG
DNA	Lung cancer	GT	AA	AT	AG
DNA	Lung cancer	GT	AA	TT	AG
DNA	Lung cancer	GT	AG	TT	AG
DNA	Lung cancer	GG	AG	AT	GG
DNA	Lung cancer	GT	AG	TT	AG
DNA	Lung cancer	TT	AA	TT	AA
DNA	Lung cancer	TT	AA	TT	AA
DNA	Lung cancer	TT	AA	TT	AA
DNA	Lung cancer	TT	AA	TT	AA
DNA	Lung cancer	GT	AG	TT	AG
DNA	Lung cancer	GG	AA	AT	GG
DNA	Lung cancer	TT	AA	TT	AA
DNA	Lung cancer	TT	AA	TT	AA
DNA	Lung cancer	TT	AA	TT	AA
DNA	Lung cancer	TT	AA	TT	AA
DNA	Lung cancer	GG	AA	AT	GG
DNA	Lung cancer	GT	AG	TT	AG
DNA	Lung cancer	TT	AA	TT	AA
DNA	Lung cancer	TT	AA	TT	AA
DNA	Lung cancer	GT	AA	AT	AG
DNA	Lung cancer	GT	AG	TT	AG
DNA	Lung cancer	GG	AA	TT	AA
DNA	Lung cancer	TT	AA	TT	AA
DNA	Lung cancer	GT	AG	TT	AG
DNA	Lung cancer	TT	AA	TT	AA
DNA	Lung cancer	GT	AA	AT	AG
DNA	Lung cancer	TT	AA	TT	AA
DNA	Lung cancer	GT	AG	TT	AG
DNA	Lung cancer	TT	AA	TT	AA
DNA	Lung cancer	TT	AA	TT	AA
DNA	Lung cancer	TT	AA	TT	AA
DNA	Lung cancer	TT	AA	TT	AA
DNA	Lung cancer	GG	AG	AT	GG
DNA	Lung cancer	TT	AA	TT	AA
DNA	Lung cancer	TT	AA	TT	AA
DNA	Lung cancer	GT	AA	TT	AG
DNA	Lung cancer	GT	AG	TT	AG
DNA	Lung cancer	GG	GG	TT	GG
DNA	Lung cancer	TT	AA	TT	AA
DNA	Lung cancer	GG	GG	TT	GG
DNA	Lung cancer	GT	AA	AT	AG
DNA	Lung cancer	GT	AA	AT	AG
DNA	Lung cancer	GG	AG	AT	GG
DNA	Lung cancer	GT	AA	AT	AG
DNA	Lung cancer	GT	AG	TT	AG
DNA	Lung cancer	TT	AA	TT	AA
DNA	Lung cancer	TT	AA	TT	AA
DNA	Lung cancer	TT	AA	TT	AA
DNA	Lung cancer	GG	AG	AT	GG
DNA	Lung cancer	TT	AA	TT	AA
DNA	Lung cancer	TT	AA	TT	AA
DNA	Lung cancer	GT	AG	TT	AG
DNA	Lung cancer	TT	AA	TT	AA
DNA	Lung cancer	TT	AA	TT	AA
DNA	Lung cancer	GT	AG	TT	AG
DNA	Lung cancer	TT	AA	TT	AA
DNA	Lung cancer	TT	AA	TT	AA
DNA	Lung cancer	GT	AG	TT	AG
DNA	Lung cancer	TT	AA	TT	AA
DNA	Lung cancer	GT	AA	AT	AG
DNA	Lung cancer	GT	AA	AT	AG
DNA	Lung cancer	GT	AG	TT	AG
DNA	Lung cancer	TT	AA	TT	AA
DNA	Lung cancer	TT	AA	TT	AA
DNA	Lung cancer	GT	AG	TT	AG
DNA	Lung cancer	TT	AA	TT	AA
DNA	Lung cancer	GT	AG	TT	AG
DNA	Lung cancer	GG	AG	AT	GG
DNA	Lung cancer	GT	AG	TT	AG
DNA	Lung cancer	TT	AA	TT	AA
DNA	Lung cancer	TT	AA	TT	AA
DNA	Lung cancer	TT	AA	TT	AA
DNA	Lung cancer	GG	AG	AT	GG
DNA	Lung cancer	GG	AG	AT	GG
DNA	Lung cancer	TT	AA	TT	AA
DNA	Lung cancer	GT	AA	AT	AG
DNA	Lung cancer	GG	AG	AT	GG
DNA	Lung cancer	TT	AA	TT	AA
DNA	Lung cancer	GG	AA	AT	GG
DNA	Lung cancer	GT	AG	TT	AG
DNA	Lung cancer	TT	AA	TT	AA
DNA	Lung cancer	TT	AA	TT	AA
DNA	Lung cancer	TT	AA	TT	AA
DNA	Lung cancer	TT	AA	TT	AA
DNA	Lung cancer	GT	AG	TT	AG
DNA	Lung cancer	GT	AG	TT	AG
DNA	Lung cancer	GT	AG	TT	AG
DNA	Lung cancer	TT	AA	TT	AA
DNA	Lung cancer	GG	AG	AT	GG
DNA	Lung cancer	TT	AA	TT	AA
DNA	Lung cancer	TT	AA	TT	AA
DNA	Lung cancer	TT	AA	TT	AA
DNA	Lung cancer	TT	AA	TT	AA
DNA	Lung cancer	GT	AG	TT	AG
DNA	Lung cancer	GG	AA	AT	GG
DNA	Lung cancer	GT	AG	TT	AG
DNA	Lung cancer	GG	GG	TT	GG
DNA	Lung cancer	GT	AG	TT	AG
DNA	Lung cancer	GT	AA	AT	AG
DNA	Lung cancer	TT	AA	TT	AA
DNA	Lung cancer	GT	AA	AT	AG
DNA	Lung cancer	TT	AA	TT	AA
DNA	Lung cancer	TT	AA	TT	AA
DNA	Lung cancer	GG	AA	TT	GG
DNA	Lung cancer	TT	AA	TT	AA
DNA	Lung cancer	GT	AA	AT	AG
DNA	Lung cancer	GT	AA	AT	AG
DNA	Lung cancer	GT	AA	AT	AG
DNA	Lung cancer	TT	AA	TT	AA
DNA	Lung cancer	GT	AA	AT	AG
DNA	Lung cancer	GT	AG	TT	AG
DNA	Lung cancer	GG	AG	AT	GG
DNA	Lung cancer	TT	AA	TT	AA
DNA	Lung cancer	TT	AA	TT	AA
DNA	Lung cancer	TT	AA	TT	AA
DNA	Lung cancer	TT	AA	TT	AA
DNA	Lung cancer	GT	AG	TT	AG
DNA	Lung cancer	TT	AA	TT	AA
DNA	Lung cancer	GT	AG	TT	AG
DNA	Lung cancer	TT	AA	TT	AA
DNA	Lung cancer	GG	AA	AT	GG
DNA	Lung cancer	GT	AA	AT	AG
DNA	Lung cancer	GT	AG	TT	AG
DNA	Lung cancer	TT	AA	TT	AA
DNA	Lung cancer	GT	AA	TT	AG
DNA	Lung cancer	GG	AG	AT	GG
DNA	Lung cancer	TT	AA	TT	AA
DNA	Lung cancer	GT	AG	TT	AG
DNA	Lung cancer	GG	AG	AT	GG
DNA	Lung cancer	TT	AA	TT	AA
DNA	Lung cancer	GT	AG	TT	AG
DNA	Control group	GT	AA	AT	AG
DNA	Control group	GG	AG	AT	GG
DNA	Control group	GT	AA	AT	AG
DNA	Control group	GT	AA	TT	AG
DNA	Control group	GT	AG	TT	AG
DNA	Control group	TT	AA	TT	AA
DNA	Control group	GT	AA	TT	AG
DNA	Control group	GT	AA	AT	AG
DNA	Control group	TT	AA	TT	AA
DNA	Control group	GT	AA	AT	AG
DNA	Control group	TT	AA	TT	AA
DNA	Control group	GT	AA	AT	AG
DNA	Control group	TT	AA	TT	AA
DNA	Control group	GT	AA	AT	AG
DNA	Control group	TT	AA	TT	AA
DNA	Control group	TT	AA	TT	AA
DNA	Control group	TT	AA	TT	AA
DNA	Control group	GT	AA	AT	AG
DNA	Control group	TT	AA	TT	AA
DNA	Control group	GG	AG	AT	GG
DNA	Control group	TT	AA	TT	AA
DNA	Control group	TT	AA	TT	AA
DNA	Control group	GT	AG	TT	AG
DNA	Control group	GT	AG	TT	AG
DNA	Control group	GT	AA	TT	AG
DNA	Control group	TT	AA	TT	AA
DNA	Control group	TT	AA	TT	AA
DNA	Control group	TT	AA	TT	AA
DNA	Control group	GG	AG	AT	GG
DNA	Control group	TT	AA	TT	AA
DNA	Control group	TT	AA	TT	AA
DNA	Control group	TT	AA	TT	AA
DNA	Control group	TT	AA	TT	AA
DNA	Control group	GT	AA	AT	AG
DNA	Control group	GT	AG	TT	AG
DNA	Control group	GG	AA	AT	GG
DNA	Control group	TT	AA	TT	AA
DNA	Control group	GT	AG	TT	AG
DNA	Control group	TT	AA	TT	AA
DNA	Control group	GT	AG	TT	AG
DNA	Control group	TT	AA	TT	AA
DNA	Control group	GT	AG	TT	AG
DNA	Control group	TT	AA	TT	AA
DNA	Control group	TT	AA	TT	AA
DNA	Control group	GT	AG	TT	AG
DNA	Control group	GT	AG	TT	AG
DNA	Control group	TT	AA	TT	AA
DNA	Control group	TT	AA	TT	AA
DNA	Control group	TT	AA	TT	AA
DNA	Control group	TT	AA	TT	AA
DNA	Control group	GT	AG	TT	AG
DNA	Control group	TT	AA	TT	AA
DNA	Control group	GT	AG	TT	AG
DNA	Control group	TT	AA	TT	AA
DNA	Control group	TT	AA	TT	AA
DNA	Control group	GT	AA	AT	AG
DNA	Control group	TT	AA	TT	AA
DNA	Control group	GT	AG	TT	AG
DNA	Control group	TT	AA	TT	AA
DNA	Control group	TT	AA	TT	AA
DNA	Control group	TT	AA	TT	AA
DNA	Control group	TT	AA	TT	AA
DNA	Control group	TT	AA	TT	AA
DNA	Control group	GT	AA	AT	AG
DNA	Control group	TT	AA	TT	AA
DNA	Control group	TT	AA	TT	AA
DNA	Control group	TT	AA	TT	AA
DNA	Control group	GT	AA	AT	AG
DNA	Control group	GT	AA	AT	AG
DNA	Control group	GT	AA	TT	AG
DNA	Control group	GT	AA	AT	AG
DNA	Control group	GT	AA	AT	AG
DNA	Control group	TT	AA	TT	AA
DNA	Control group	GT	AA	AT	AG
DNA	Control group	GT	AA	TT	AG
DNA	Control group	GT	AG	TT	AG
DNA	Control group	GT	AA	AT	AG
DNA	Control group	GT	AG	TT	AG
DNA	Control group	TT	AA	TT	AA
DNA	Control group	GT	AG	TT	AG
DNA	Control group	GT	AA	AT	AG
DNA	Control group	GG	GG	TT	GG
DNA	Control group	GT	AA	AT	AG
DNA	Control group	GG	AG	AT	GG
DNA	Control group	GT	AA	AT	AG
DNA	Control group	TT	AA	TT	AA
DNA	Control group	TT	AA	TT	AA
DNA	Control group	GT	AA	AT	AG
DNA	Control group	GG	AA	AT	GG
DNA	Control group	GT	AG	TT	AG
DNA	Control group	GG	AG	TT	AG
DNA	Control group	TT	AA	TT	AA
DNA	Control group	GT	AA	TT	AG
DNA	Control group	GG	GG	TT	GG
DNA	Control group	TT	AA	TT	AA
DNA	Control group	TT	AA	TT	AA
DNA	Control group	GG	GG	TT	GG
DNA	Control group	TT	AA	TT	AA
DNA	Control group	GT	AA	TT	AG
DNA	Control group	GG	AA	AT	GG
DNA	Control group	GT	AG	TT	AG
DNA	Control group	TT	AA	TT	AA
DNA	Control group	GT	AA	TT	AG
DNA	Control group	TT	AA	TT	AA
DNA	Control group	TT	AA	TT	AA
DNA	Control group	GT	AA	AT	AG
DNA	Control group	TT	AA	TT	AA
DNA	Control group	TT	AA	TT	AA
DNA	Control group	GT	AG	TT	AG
